# Supplementary material for: Novel Putative Tymoviridae-like Virus Isolated from Culex Mosquitoes in Colombia
Source: Viruses. 2023 Apr 13;15(4):953. doi: 10.3390/v15040953 (PMC10143313; doi:10.3390/v15040953)
Supplement: Supplementary file 1 [file viruses-15-00953-s001.zip]

Archive with 4 entries (4 files):
- Supplementary Figure 1.pdf
- Supplementary Figure 2.pdf
- Supplementary Figure 3.pdf
- Supplementary figure legends.pdf
