# Supplementary figures and images for: Novel Putative Tymoviridae-like Virus Isolated from Culex Mosquitoes in Colombia
Source: MDPI journal article supplement (doi:10.3390/v15040953), 2023-04-13

a)

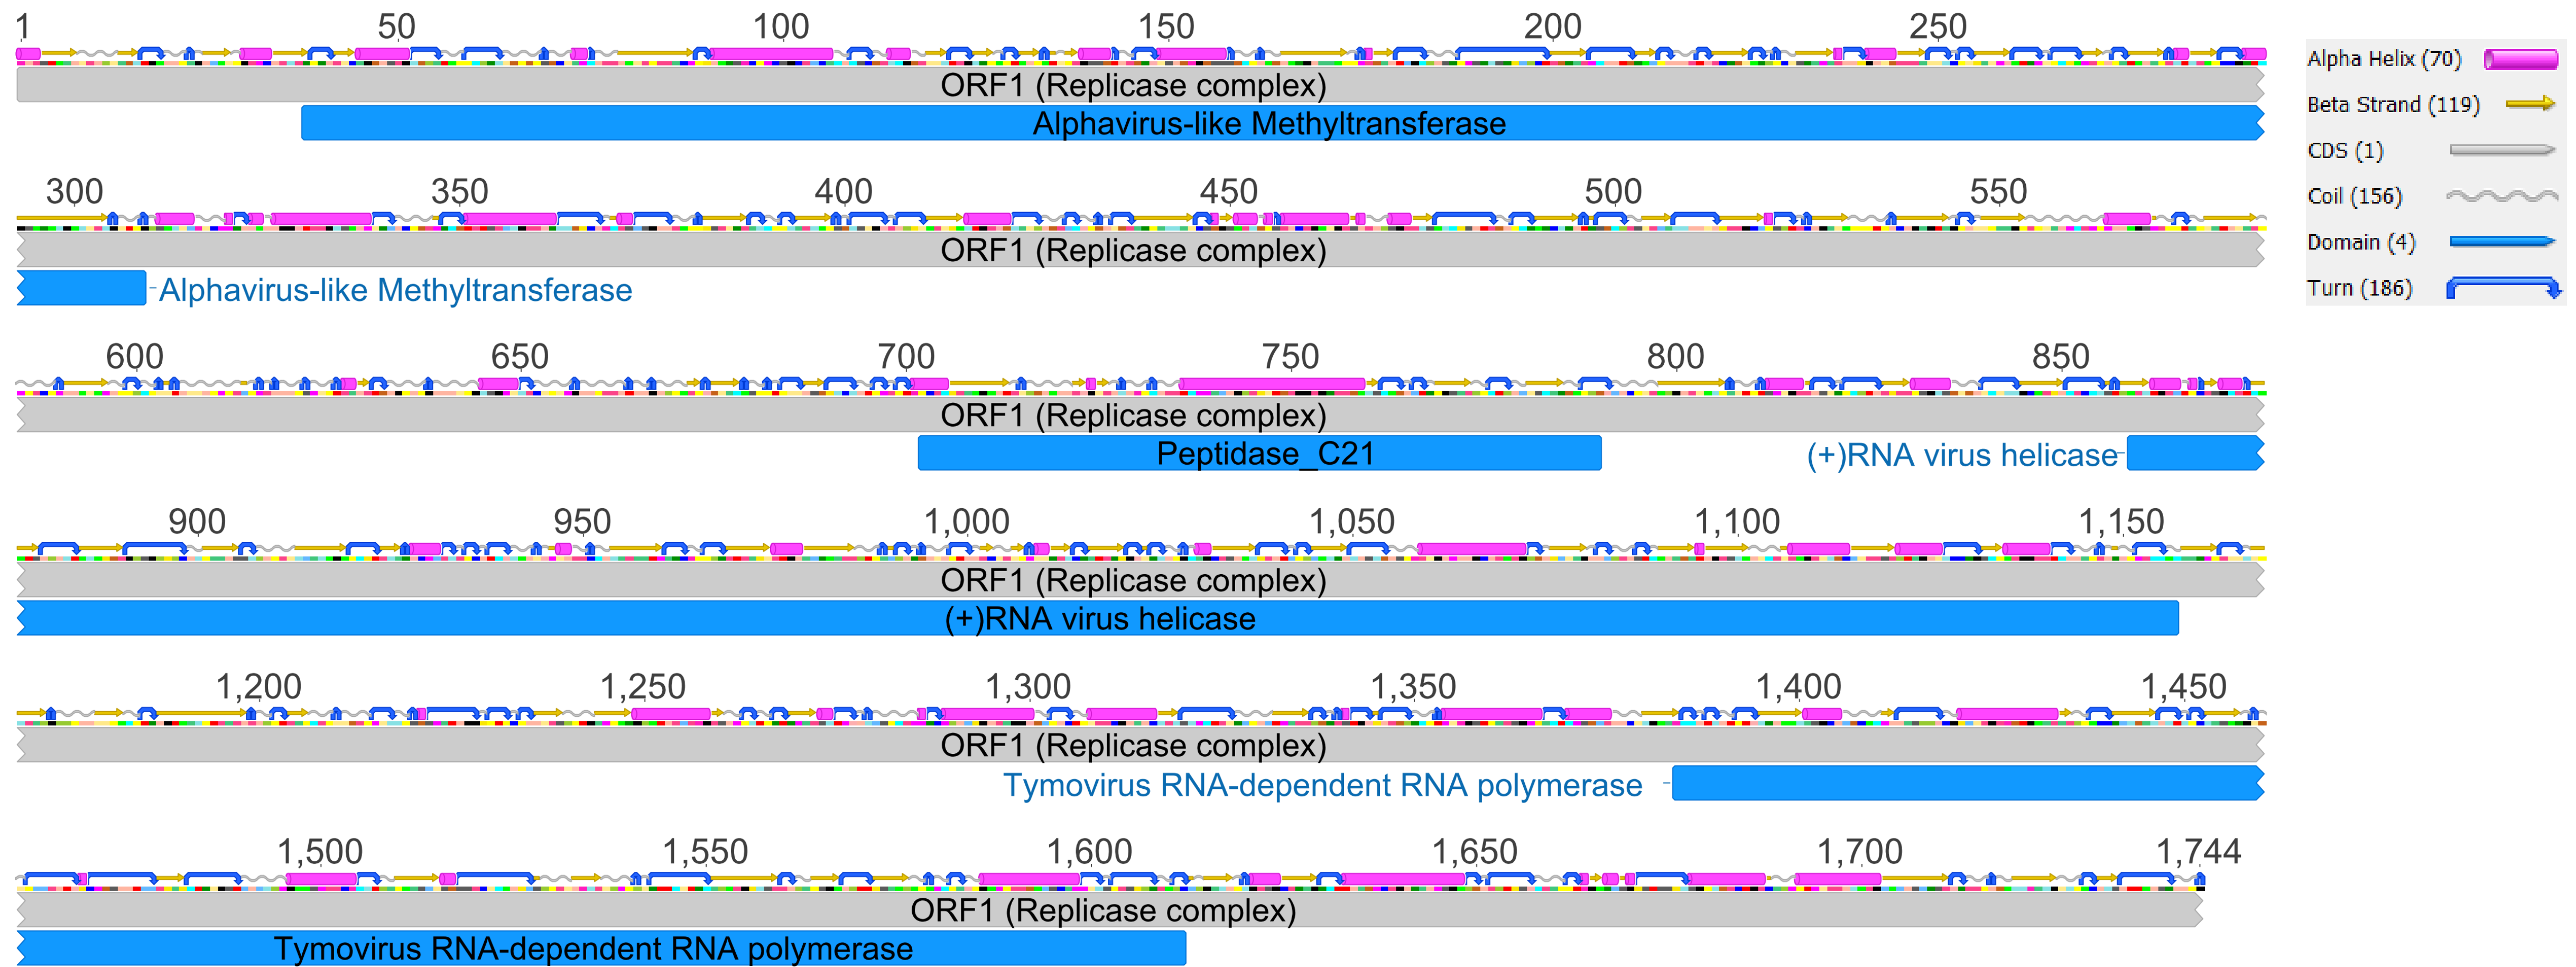

b)

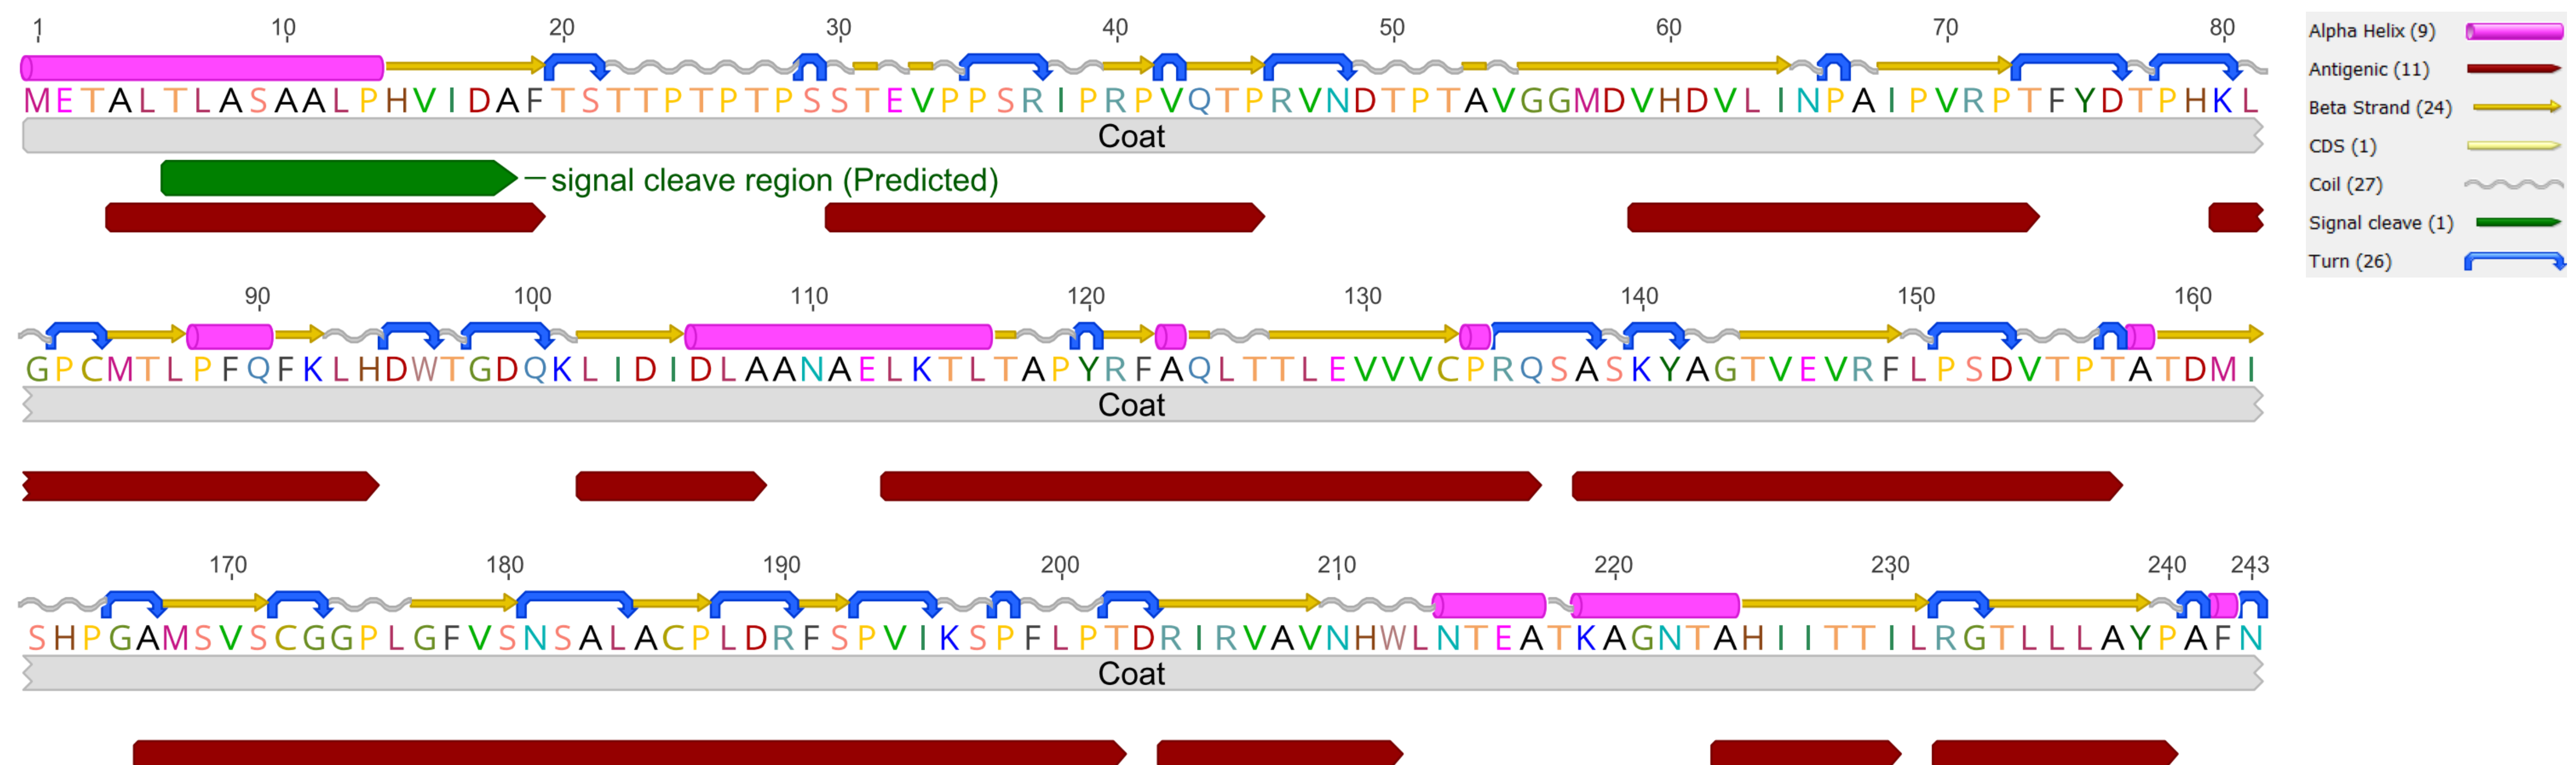

Supplement: s1 [file s1]

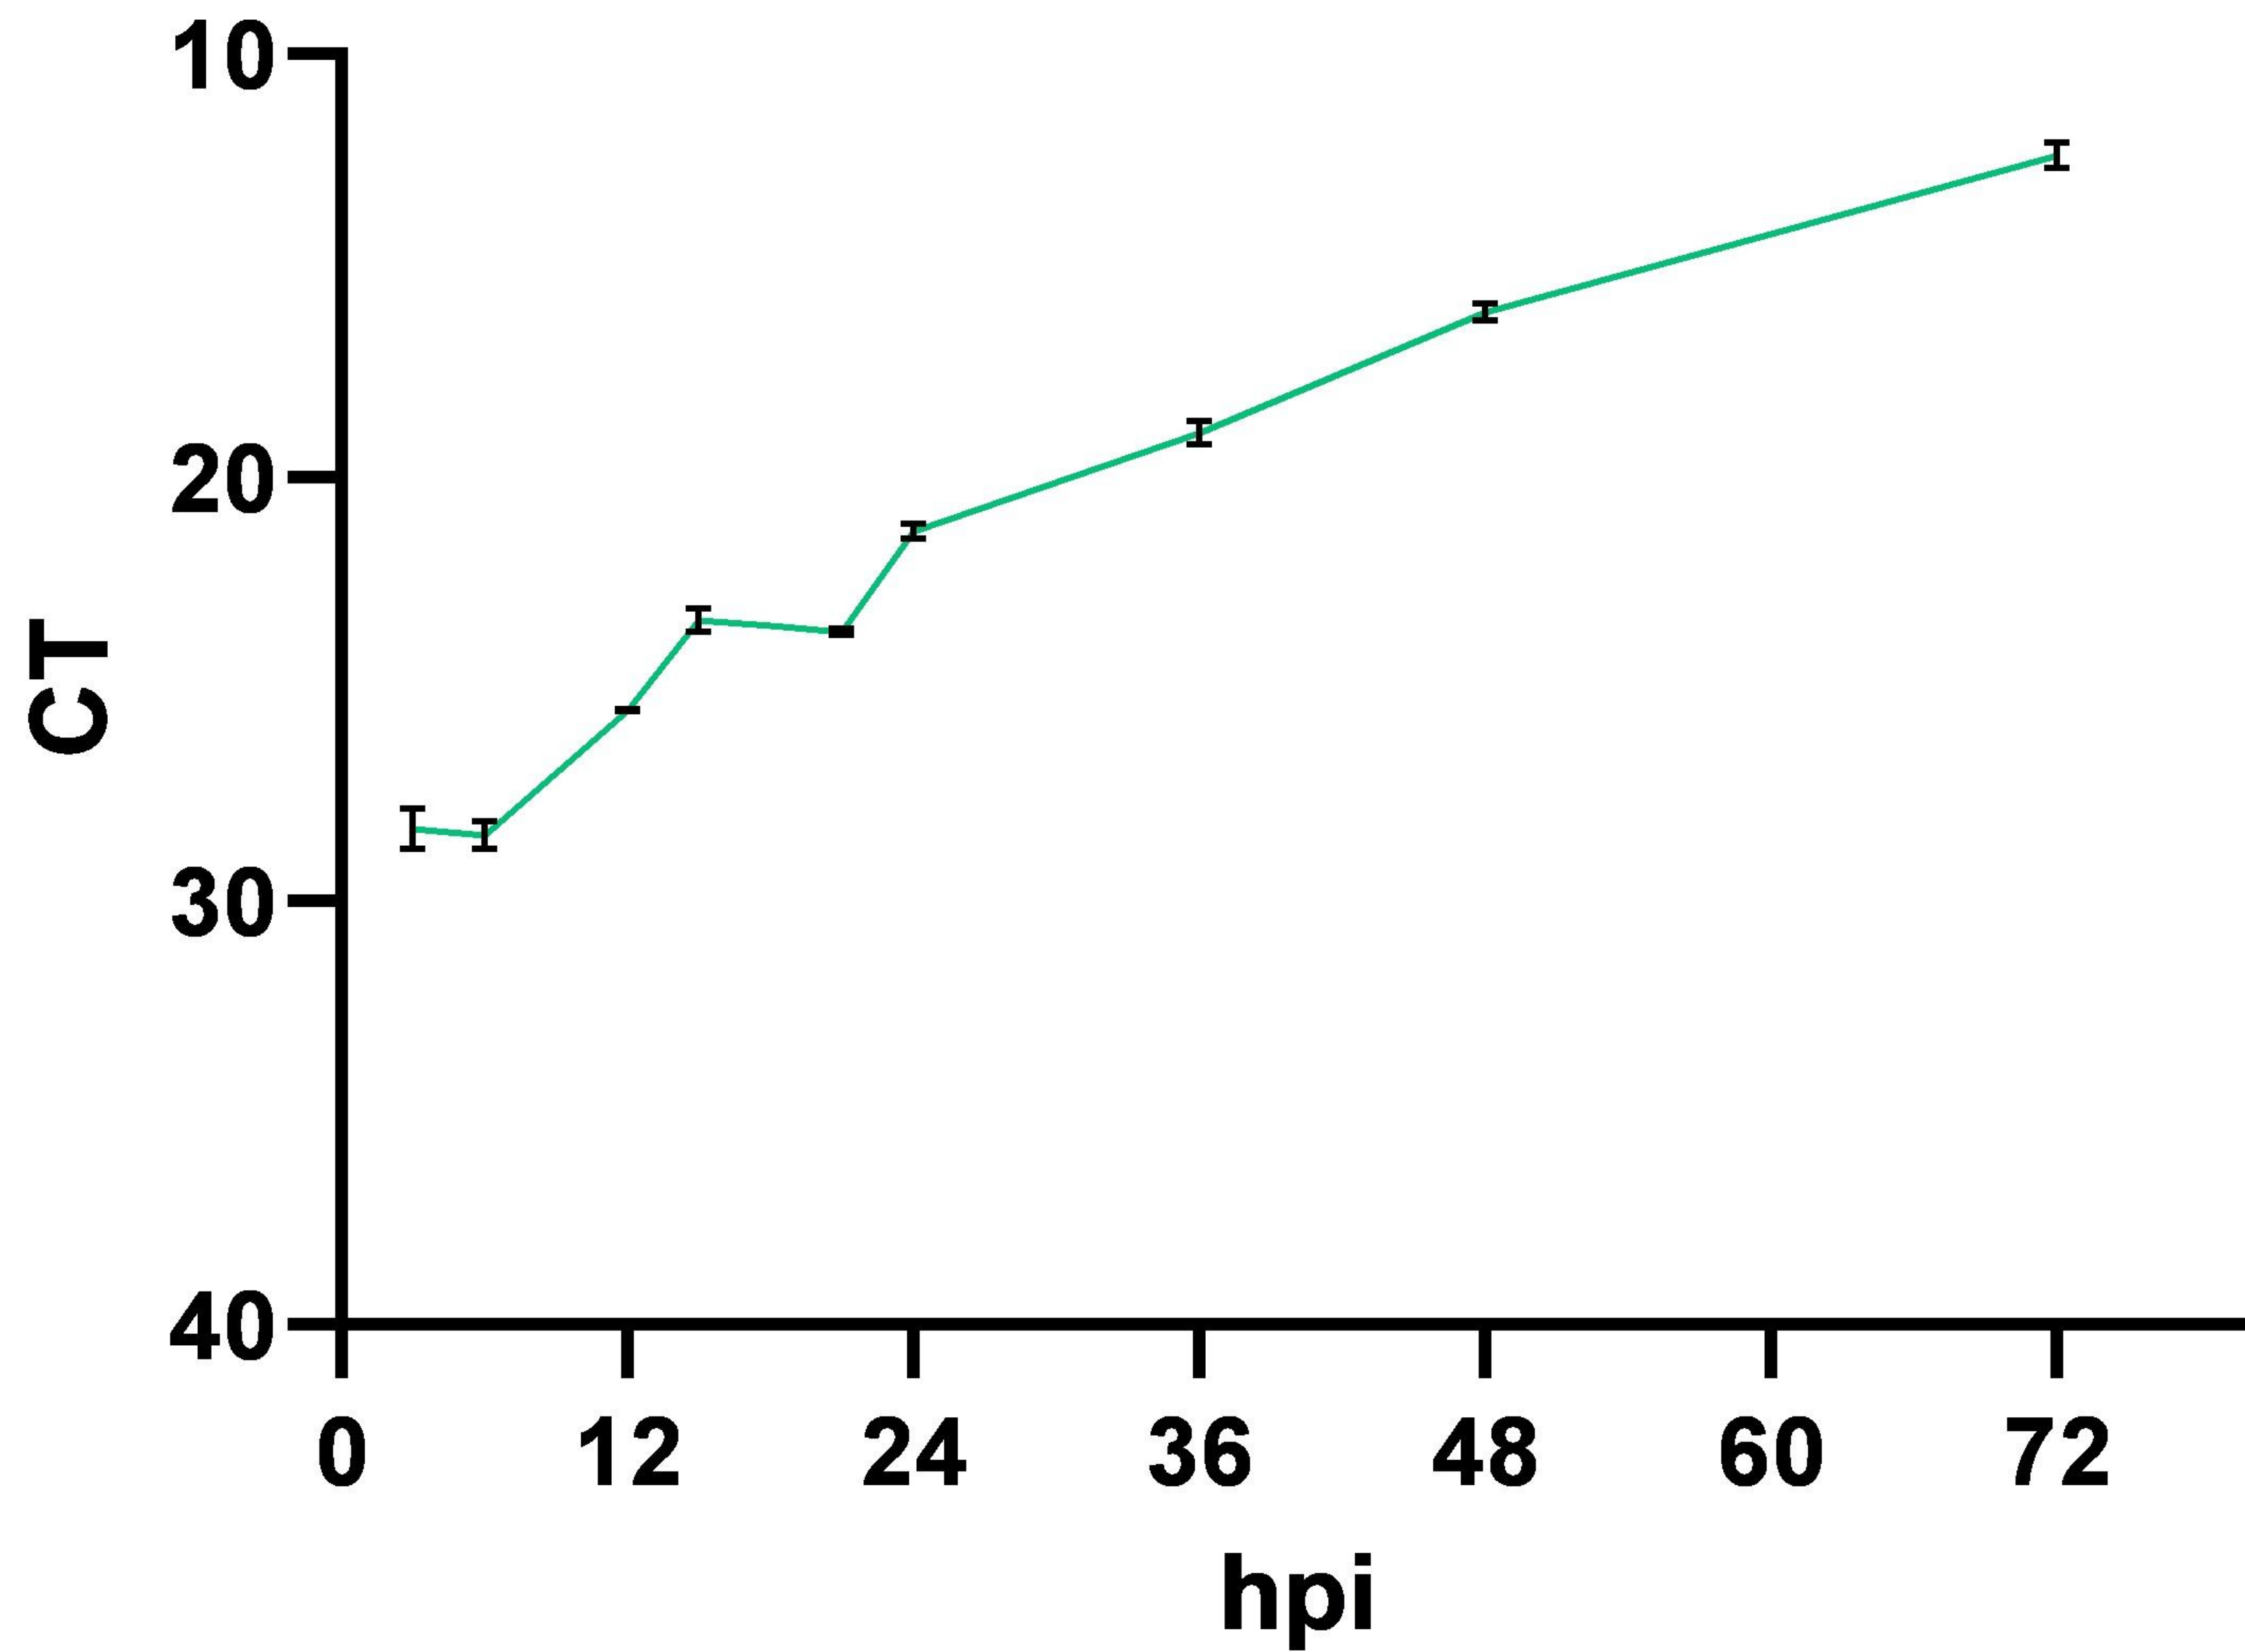

Supplement: s1 [file s1]

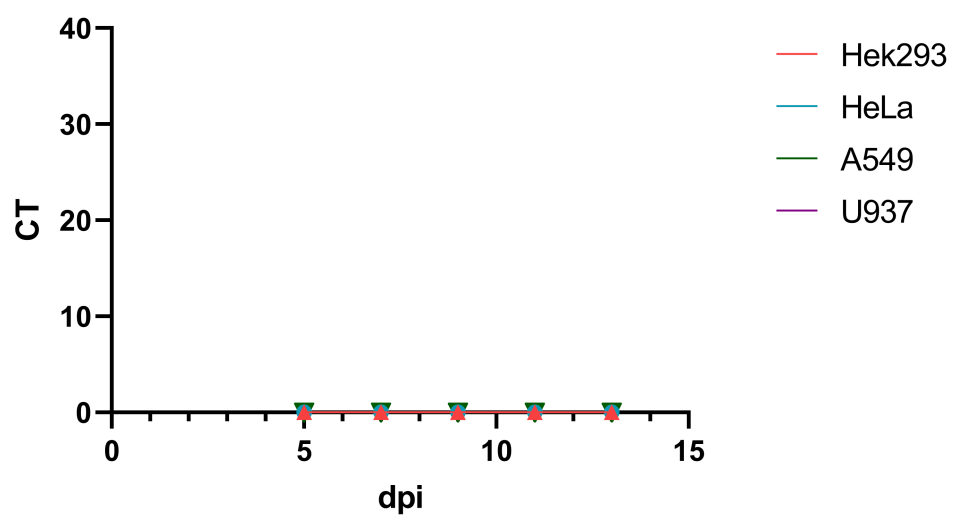

Supplement: s1 [file s1]
